## Research Paper

# Prognostic and clinicopathological significance of long noncoding RNA H19 overexpression in human solid tumors: evidence from a meta-analysis

Fang-teng Liu<sup>1</sup>, Hua Pan<sup>1</sup>, Guang-feng Xia<sup>1</sup>, Cheng Qiu<sup>1</sup>, Zheng-ming Zhu<sup>1</sup>

<sup>1</sup>Department of General Surgery, the Second Affiliated Hospital of Nanchang University, Nanchang 330000, Jiangxi Province, P. R. China

Correspondence to: Zheng-ming Zhu, email: zzm8654@163.com

Keywords: long noncoding RNA, H19, carcinoma, prognosis, meta-analysis

Received: April 29, 2016

Accepted: October 17, 2016

Published: November 04, 2016

## ABSTRACT

**Background:** Many studies have reported that the expression level of lncRNA H19 was increased in various tumors. lncRNA H19 may play a significant role in cancer occurrence and development. An increased level of H19 was also associated with poor clinical outcomes of cancer patients.

**Results:** 12 eligible studies were screened, with a total of 1437 cancer patients. From the results of meta-analysis, as for prognosis, the patients with high expression of lncRNA H19 were shorter in OS (HR=1.08, 95% CI: 1.05-1.12). Statistical significance was also showed in subgroup meta-analysis stratified by the cancer type, analysis type and sample size. In addition, the patients detected with high H19 expression may be poorer in DFS (HR=1.27; 95% CI = 0.97-1.56). As for clinicopathology, it showed that increased H19 was related to poor histological grades (OR=2.31, 95% CI: 1.12-4.75), positive lymph node metastasis (OR=2.29, 95 % CI: 1.21-4.34) and advanced clinical stage (OR=4.83, 95% CI: 3.16-7.39).

**Materials and Methods:** Eligible studies were collected by retrieving keywords in PubMed, Web of Science, Embase, CNKI and Wanfang database, from 1966 to April 23, 2016. This quantitative meta-analysis was performed with Stata SE12.0 and RevMan5.3 software. It aimed to explore the association between H19 expression level and prognosis and clinicopathology.

**Conclusions:** lncRNA-H19 may be a novel molecular marker for predicting solid tumors. It can also be a predictive factor of clinicopathological features in various cancers. Further studies are needed to verify the clinical utility of H19 in human cancers.

## INTRODUCTION

With the development of sequencing technique, it revealed that a majority of human genome was actively transcribed into noncoding RNAs (ncRNAs). Long noncoding RNAs (lncRNAs) was one type of ncRNAs, which attracted widespread interest and attention in current days [1, 2]. The lncRNAs was more than 200 nucleotides in length without protein-coding capacity [3]. Many studies showed that lncRNAs play vital roles in diverse biological processes, as well as in disease mechanism [4–7]. Especially in cancers, some lncRNAs were proved to act as tumor promoter or suppressor in the progress of tumorigenesis [8, 9]. It reported that

dys-regulated expression of lncRNAs was involved in apoptosis, proliferation and invasion of cancer cells [10–12]. lncRNA could be served as promising biomarkers for diagnosis and potential therapeutic targets in cancers. However, biological functions of most lncRNAs remained far from clear.

H19, also known as BWS, ASM1 and ASM, is a paternally imprinted gene, which locates in 11p15.5 [13]. The long noncoding RNA H19 was encoded by this highly conserved imprinted gene. In recent years, increasing studies have reported that lncRNA-H19 was up-regulated in various cancers, such as non-small cell lung cancer, bladder cancer, breast cancer and gastric cancer [14–17]. The tumor cell proliferation,

invasion and metastasis would be promoted with up-regulated expression of lncRNA-H19. It suggested that lncRNA-H19 may be functioned as an oncogene in tumorigenicity [18–20]. The expression level of lncRNA-H19 in cancerous tissues was determined to be significantly higher than that of in adjacent normal tissues. In addition, lncRNA-H19 expression was positive associated with poor clinical outcomes in multiple tumors. Therefore, lncRNA-H19 might be feasible as prognostic prediction biomarker.

A meta-analysis has been performed to explore the correlation between lncRNA-H19 expression and clinical outcome in cancer patients. It further discussed whether lncRNA-H19 could be served as a practical biomarker on prognosis prediction in human solid tumors.

## RESULTS

### Main information of included studies

12 studies [21–32] were finally identified according to the inclusion and exclusion criteria. The process of literature retrieval was shown (Figure 1). A total of 1437 patients in 12 studies were included in this analysis. The mean sample size of patients was 119.7 (ranged from 24

to 361). The cancer cases in 12 included studies were all Asians (11 from China, 1 from Korea). In the 12 studies, 9 types of cancer were evaluated: 4 gastric cancer (GC), 1 non-small cell lung cancer (NSCLC), 1 renal cell carcinoma (RCC), 1 ovarian cancer (OC), 1 gallbladder cancer (GBC), 1 laryngeal squamous cell cancer (LSCC), 1 colorectal cancer (CRC), 1 esophageal cancer (EC) and 1 hepatocellular carcinoma (HCC). All these cancer types were solid cancer. The main information and data were summarized (Table 1).

### The determination of H19 in included studies

The comparison of H19 expression level from included studies was important in meta-analysis. In these studies, known expression level of H19 was determined with qRT-PCR. The high expression of H19 in individual study was provided (Table 1). It slightly differed in different papers. However, the results from these studies could be still comparable. The determination of H19 expression was influenced by following factors: 1. Determination principle, for the included studies, the determination principle was the same, which was qRT-PCR. 2. Primer and potential probes, the primer and probes may be slightly different. However, the highly

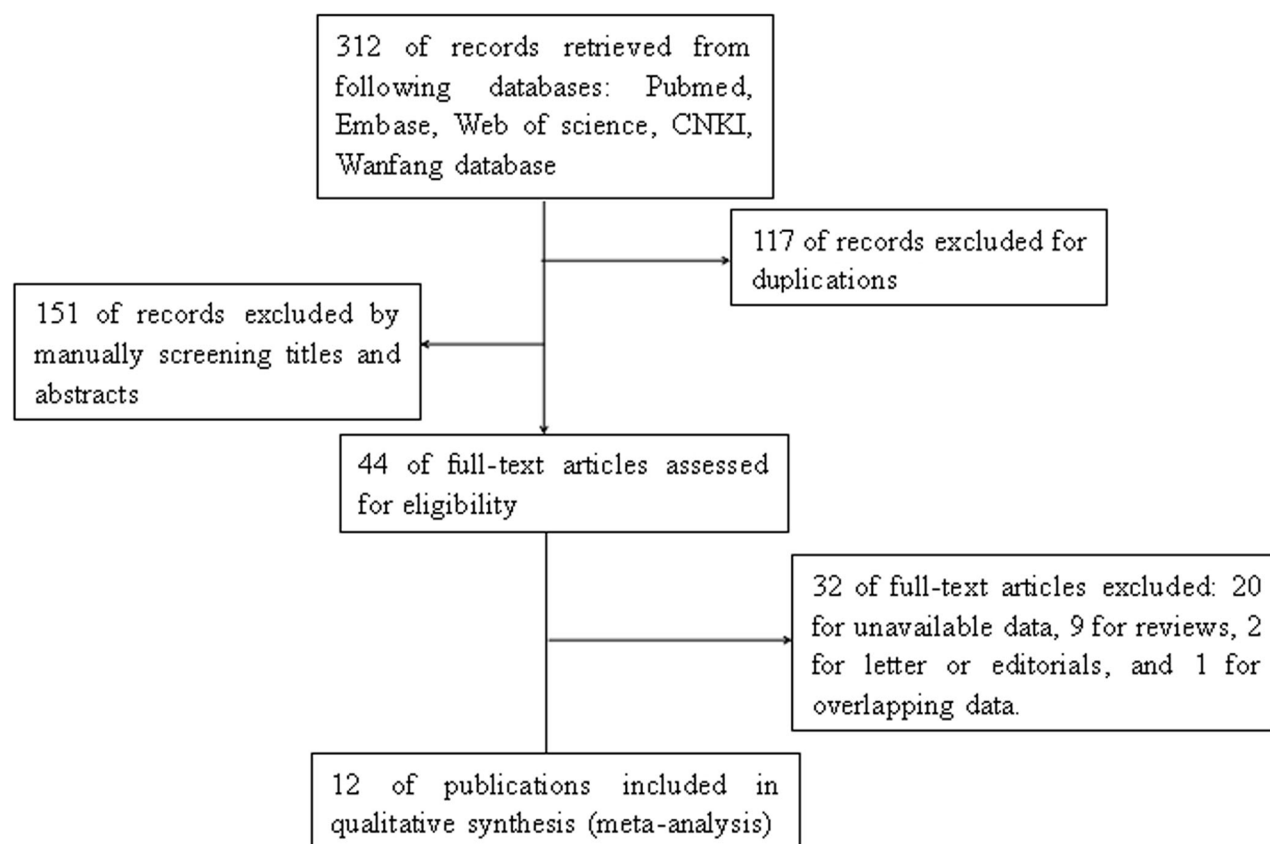

**Figure 1: Flowchart indicated the process of literature retrieval and selection.**

**Table 1: The main information of included studies in the meta-analysis**

| Author<br>(Publication<br>year) | Country | Cancer<br>type | Total<br>sample<br>size | Therapy<br>before | Tumor stage<br>(I/II/III/IV) | Follow-up<br>(months) | Outcome<br>measures | Analysis<br>type                             | Cut-off<br>value of<br>H19<br>expression | Detection<br>method<br>of H19<br>expression |
|---------------------------------|---------|----------------|-------------------------|-------------------|------------------------------|-----------------------|---------------------|----------------------------------------------|------------------------------------------|---------------------------------------------|
| Zhang,<br>2014 [21]             | China   | GC             | 80                      | None              | 15/21/33/11                  | Over 60               | OS                  | Multivariate                                 | above the<br>mean                        | qRT-PCR                                     |
| Li,<br>2014 [22]                | China   | GC             | 74                      | N/A               | 57/17(I-II/<br>III-IV)       | 1-50                  | OS                  | Kaplan-Meier<br>curves                       | ≥6-fold                                  | qRT-PCR                                     |
| Wang,<br>2015 [23]              | China   | RCC            | 92                      | N/A               | 56/36(G1-2/<br>G3-4)         | 1-60                  | OS                  | Multivariate                                 | ≥3.8-fold                                | qRT-PCR                                     |
| Zhang,<br>2015 [24]             | China   | NSCLC          | 70                      | N/A               | 18/32/18/2                   | 1-60                  | OS                  | Multivariate                                 | above<br>median                          | qRT-PCR                                     |
| Zhu,<br>2015 [25]               | China   | OC             | 70                      | None              | 21/49(I-II/<br>III-IV)       | N/A                   | N/A                 | N/A                                          | N/A                                      | qRT-PCR                                     |
| Huang,<br>2015 [31]             | China   | EC             | 133                     | N/A               | 63/70(0-I/<br>II-IV)         | N/A                   | N/A                 | N/A                                          | >median                                  | qRT-PCR                                     |
| Yang,<br>2015 [30]              | Korea   | HCC            | 240                     | None              | 102/100/33/5                 | Over 60               | OS,DFS              | Univariate<br>(OS);<br>Multivariate<br>(DFS) | ≥ median                                 | N/A                                         |
| Wang,<br>2016 [26]              | China   | GBC            | 24                      | None              | 12/12(I-II/<br>III-IV)       | 1-40                  | OS                  | Kaplan-Meier<br>curves                       | ≥ median<br>ratio                        | qRT-PCR                                     |
| Chen,<br>2016 [28]              | China   | GC             | 128                     | N/A               | 27/53/45/3                   | median 36             | OS,DFS              | Multivariate                                 | ≥4.47-fold                               | qRT-PCR                                     |
| Wu,<br>2016 [27]                | China   | LSCC           | 82                      | N/A               | 45/37(I-II/<br>III-IV)       | 1-60                  | OS                  | Kaplan-Meier<br>curves                       | N/A                                      | qRT-PCR                                     |
| Li,<br>2016 [32]                | China   | GC             | 361                     | N/A               | 133/228<br>(G1-2/G3-x)       | 1-60                  | OS                  | Kaplan-Meier<br>curves                       | N/A                                      | N/A                                         |
| Han,<br>2016 [29]               | China   | CRC            | 83                      | N/A               | 38/45(I-II/<br>III-IV)       | Over 40               | OS,DFS              | Multivariate                                 | ≥3-fold                                  | qRT-PCR                                     |

**Abbreviations:** GC: gastric cancer; RCC: renal cell carcinoma; NSCLC: non-small cell lung cancer; OC: ovarian cancer; EC: esophageal cancer; HCC: hepatocellular carcinoma; GBC: gallbladder cancer; LSCC: laryngeal squamous cell cancer; CRC: colorectal cancer; OS: overall survival; Multivariate: multivariate analysis; Univariate: univariate analysis; N/A: not available

conserved sequence of H19 enabled similar amplification efficiency, even with slightly varied primer and probe sequence. 3. Determination rules, such as cutoff value, most of the cutoff value was determined as median value of adjacent control tissues.

### Association between lncRNA-H19 expression and OS

In 12 included studies, 10 studies reported the prognosis of OS according to H19 expression levels, with a total of 1234 patients. There was no significant heterogeneity among studies ( $I^2=38.6\%$ ,  $P_h=0.101$ ). The fixed-effects model was adopted to calculate the pooled HRs with corresponding 95% confidence intervals (CIs).

The HRs was expressed as high H19 expression group versus low H19 expression group, which was 1.08 (95% CI: 1.05-1.12,  $p<0.001$ ) (Figure 2).

A subgroup analysis was performed based on the types of cancer. A positive result was observed in patients with gastric cancer (HR: 1.15, 95% CI: 1.01-1.28,  $p<0.001$ ) (Table 2, the figure was presented in Supplement information Figure S1). When all cancer types were generally classified into 2 categories (digestive system cancers and others), a similar result was found in digestive system cancers (HR: 1.07, 95% CI: 1.01-1.13,  $p<0.001$ ) (Figure 3). It suggested that the up-regulated lncRNA-H19 expression was positively correlated with poor prognosis in patients with digestive system cancers.

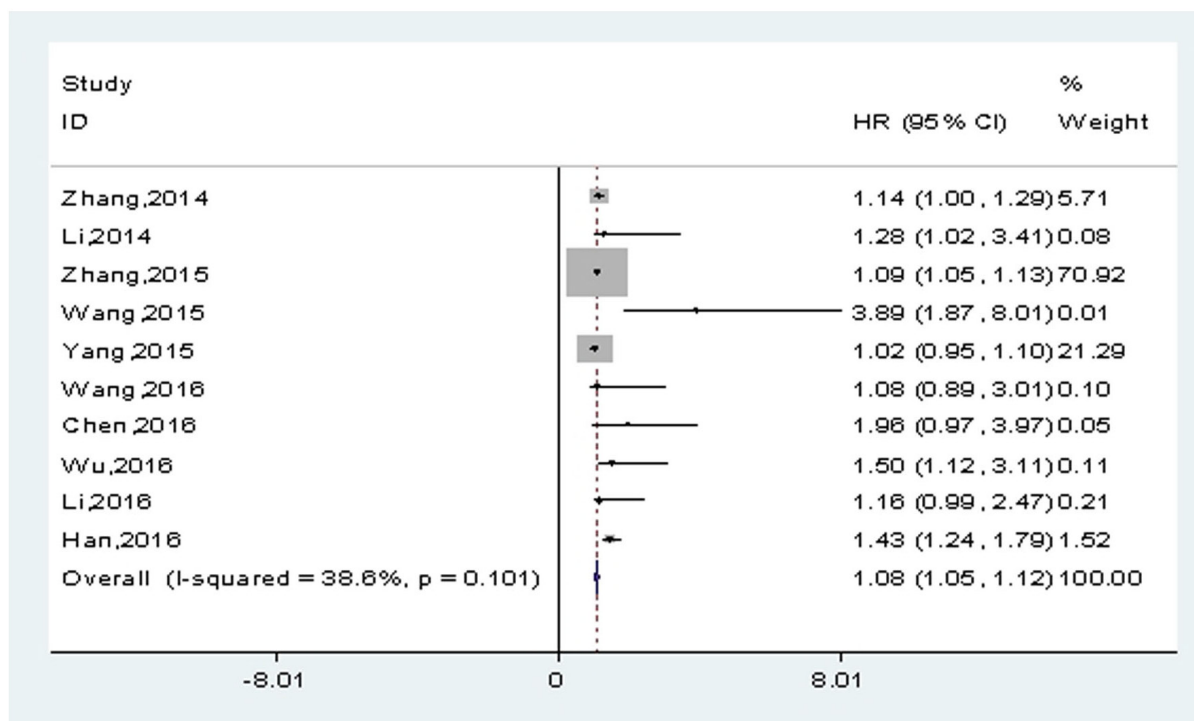

Figure 2: Meta-analysis of the pooled HRs of OS in solid cancers.

Table 2: Meta-analysis results of the associations of lncRNA-H19 with OS according to subgroup analysis

| Categories                  | Studies (n) | Number of patients | Fixed-effects model |         | Heterogeneity      |                |
|-----------------------------|-------------|--------------------|---------------------|---------|--------------------|----------------|
|                             |             |                    | HR (95% CI) for OS  | p-value | I <sup>2</sup> (%) | P <sub>h</sub> |
| [1] OS                      | 10          | 1234               | 1.08(1.05-1.12)     | < 0.001 | 38.6               | 0.101          |
| [2] Cancer type             |             |                    |                     |         |                    |                |
| 1) Digestive system cancers | 6           | 966                | 1.07(1.01-1.13)     | < 0.001 | 52.9               | 0.060          |
| Others                      | 4           | 268                | 1.09(1.05-1.13)     | < 0.001 | 22.4               | 0.276          |
| 2) Gastric cancer           | 4           | 643                | 1.15(1.01-1.28)     | < 0.001 | 0.0                | 0.756          |
| Others                      | 6           | 591                | 1.08(1.04-1.11)     | < 0.001 | 60.3               | 0.027          |
| [3] Analysis type           |             |                    |                     |         |                    |                |
| Multivariate                | 5           | 453                | 1.10(1.06-1.14)     | < 0.001 | 62.9               | 0.029          |
| Non-multivariate            | 5           | 781                | 1.03(0.96-1.10)     | < 0.001 | 0.0                | 0.883          |
| [4] Sample size             |             |                    |                     |         |                    |                |
| ≥ 100                       | 3           | 729                | 1.03(0.96-1.10)     | < 0.001 | 0.0                | 0.449          |
| < 100                       | 7           | 505                | 1.10(1.06-1.14)     | < 0.001 | 41.5               | 0.115          |

Moreover, for OS, the pooled HRs was significantly and consistently higher than 1 in subgroup meta-analysis, which was stratified by the analysis type and sample size (Table 2, the two figures were presented in Supplementary information Figure S2, S3).

From the overall results, a significant difference of OS was observed between the two groups. OS was prone to reduced in the patients with high H19 expression than that of with low H19 expression. Higher H19 expression was positively correlated with worse survival in various

cancers. Sensitivity analysis for OS in solid tumors showed no significant changes in HRs when any individual study was excluded (Figure 4).

### Association between lncRNA-H19 expression and DFS

In this meta-analysis, 3 studies reported the data of HR values and corresponding 95 % CIs, with a total of 451 patients. Therefore, they were directly applied for evaluating the association between lncRNA-H19 expression and DFS. Because there was significant statistical heterogeneity across-studies ( $I^2=79.6\%$ ;  $P_h=0.007$ ), the random-effects model was applied. The pooled HR revealed that there may be a significantly positive association between high expression level of lncRNA-H19 and poor DFS (HR=1.27, 95% CI = 0.97-1.56,  $p < 0.001$ ) (Figure 5).

### Association between lncRNA-H19 expression and clinicopathological parameters

The pooled ORs and 95% CIs of clinicopathological parameters in human solid tumors were showed (Table 3). From meta-analysis results, it found that the over-expressed H19 was associated with poor histological grade (OR=2.31, 95% CI: 1.12-4.75,  $p=0.02$ ), positive lymph node metastasis (OR=2.29, 95% CI: 1.21-4.34,  $p=0.01$ ), and advanced TNM stage (OR=4.83,

95% CI: 3.16-7.39,  $p<0.001$ ). However, no significant correlation was observed between H19 expression and gender or distant metastasis ( $p>0.05$ ) (All those figures were presented in Supplement information Supplementary Figure S4-S8). The correlation of H19 expression and other clinicopathological parameters could not be obtained for insufficient information from current studies.

### Publication bias

The publication bias for OS in solid cancers was evaluated with funnel plots, Begg's and Egger's tests. The Begg's funnel plots revealed no publication bias among these studies ( $z=1.70$ ,  $Pr > |z| = 0.089$ , Figure 6), but the p-value of Egger's test for OS showed a slight publication bias among included studies ( $p=0.039$ ). Then, the trim and fill method was further applied to test for publication bias. The results showed no significant publication bias across studies. Because the number of included studies was limited ( $n<10$ ), the publication bias for clinicopathological parameters was not assessed.

## DISCUSSION

lncRNA-H19 has been identified as one cancer-related lncRNAs. The high expression level of H19 was considered to be correlated with diverse human disorders and cancers. Growing evidences showed that this H19 gene-encoded 2.3 kb lncRNA functioned in tumorigenesis

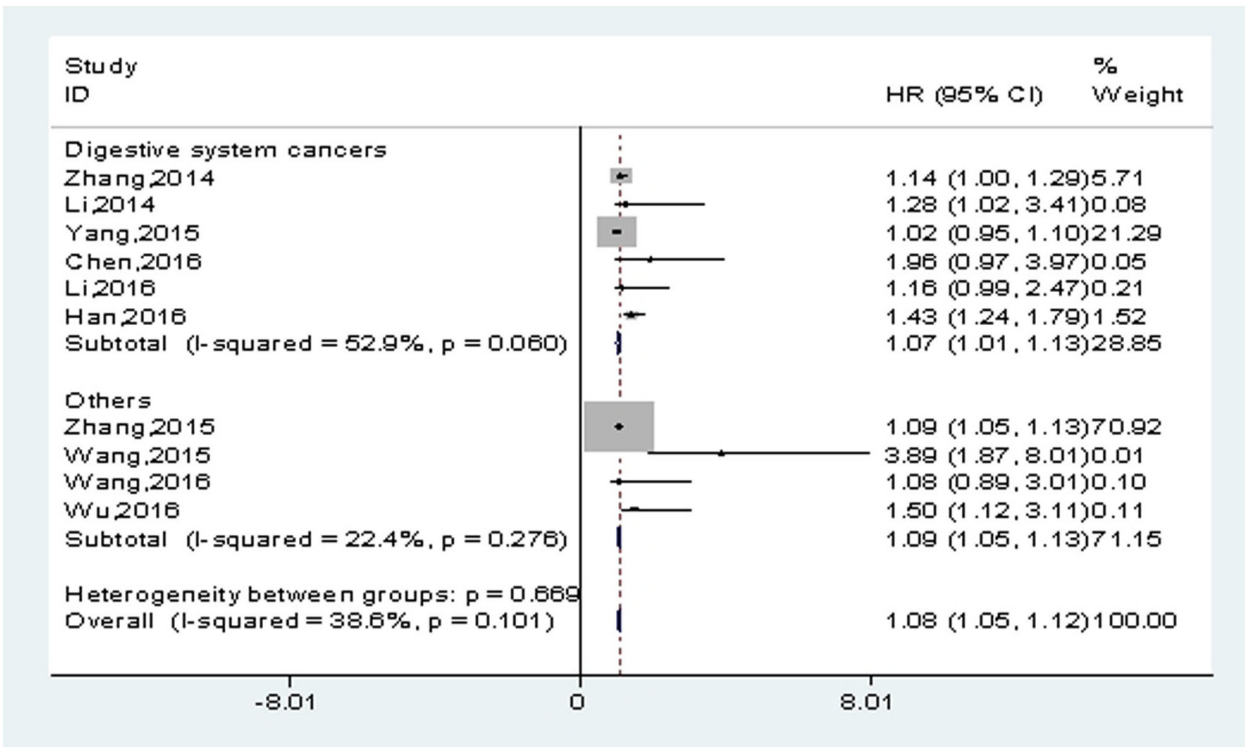

Figure 3: Meta-analysis for the pooled HRs of OS in patients with various cancers.

and cancer progression. The development of cancer may be promoted by the up-regulated expression of H19 [33–35].

The high expression of lncRNA-H19 may be a biomarker for cancer prognosis. Numerous studies have shown that expression levels of lncRNA-H19 in tumor

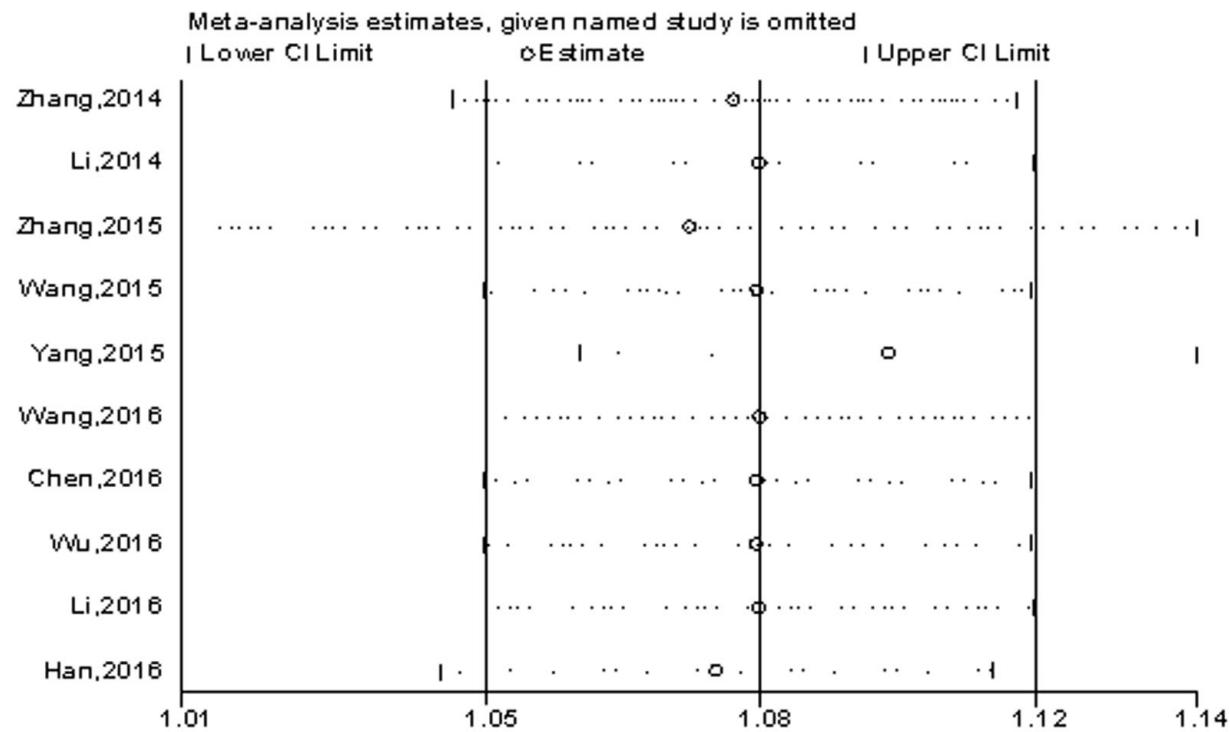

Figure 4: Sensitivity analysis on the relationship between lncRNA-H19 expression and OS.

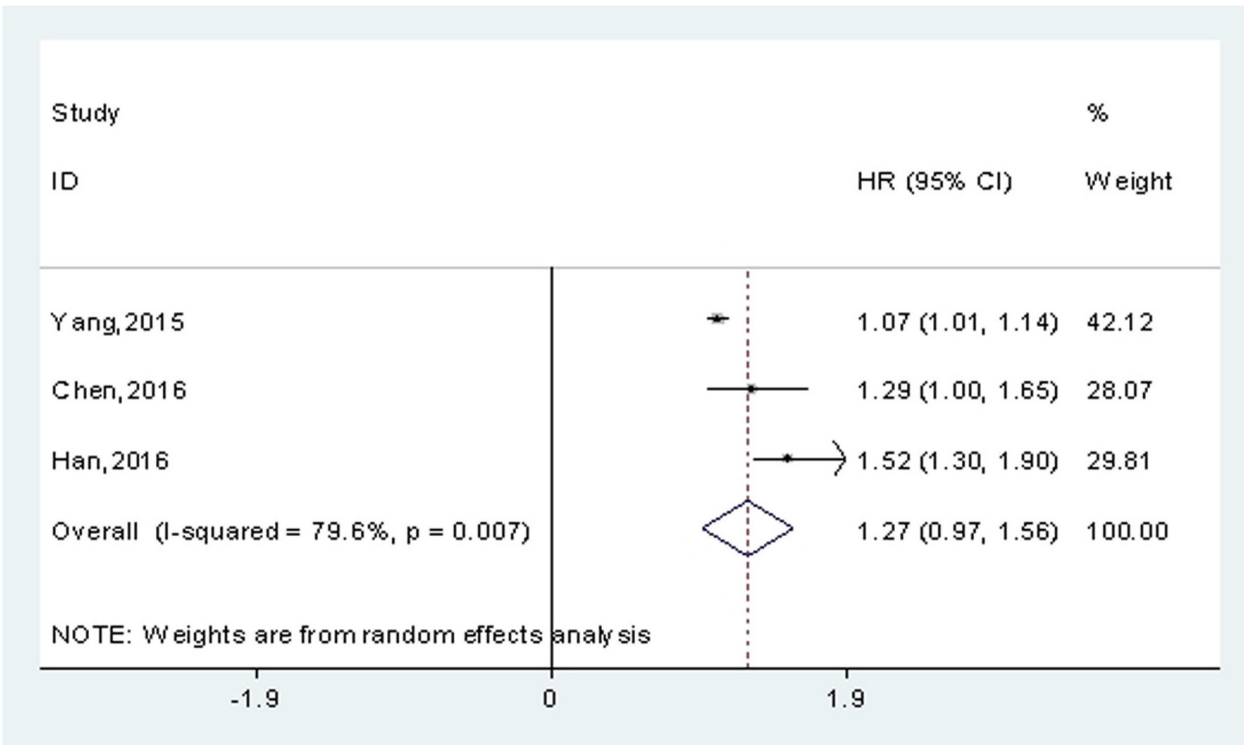

Figure 5: Meta-analysis for the pooled HRs of DFS.

**Table 3: Meta-analysis results for the associations of over-expressed lncRNA-H19 with clinicopathological parameters**

| Clinicopathological parameters                            | Studies (n) | Number of patients | OR (95% CI)     | p-value | Heterogeneity      |                |                |
|-----------------------------------------------------------|-------------|--------------------|-----------------|---------|--------------------|----------------|----------------|
|                                                           |             |                    |                 |         | I <sup>2</sup> (%) | P <sub>h</sub> | Model          |
| Gender (male vs. female)                                  | 7           | 610                | 0.90(0.65-1.25) | 0.54    | 0                  | 3.6            | Fixed effects  |
| Tumor differentiation (poorly/others vs. well/moderately) | 6           | 467                | 2.31(1.12-4.75) | 0.02    | 62                 | 13.24          | Random effects |
| Lymph node metastasis (+ vs.-)                            | 7           | 547                | 2.29(1.21-4.34) | 0.01    | 62                 | 15.68          | Random effects |
| Distant metastasis (+ vs.-)                               | 4           | 436                | 0.83(0.20-3.46) | 0.80    | 81                 | 15.6           | Random effects |
| TNM stage (III-IV vs. I-II)                               | 6           | 455                | 4.83(3.16-7.39) | <0.001  | 0                  | 3.56           | Fixed effects  |

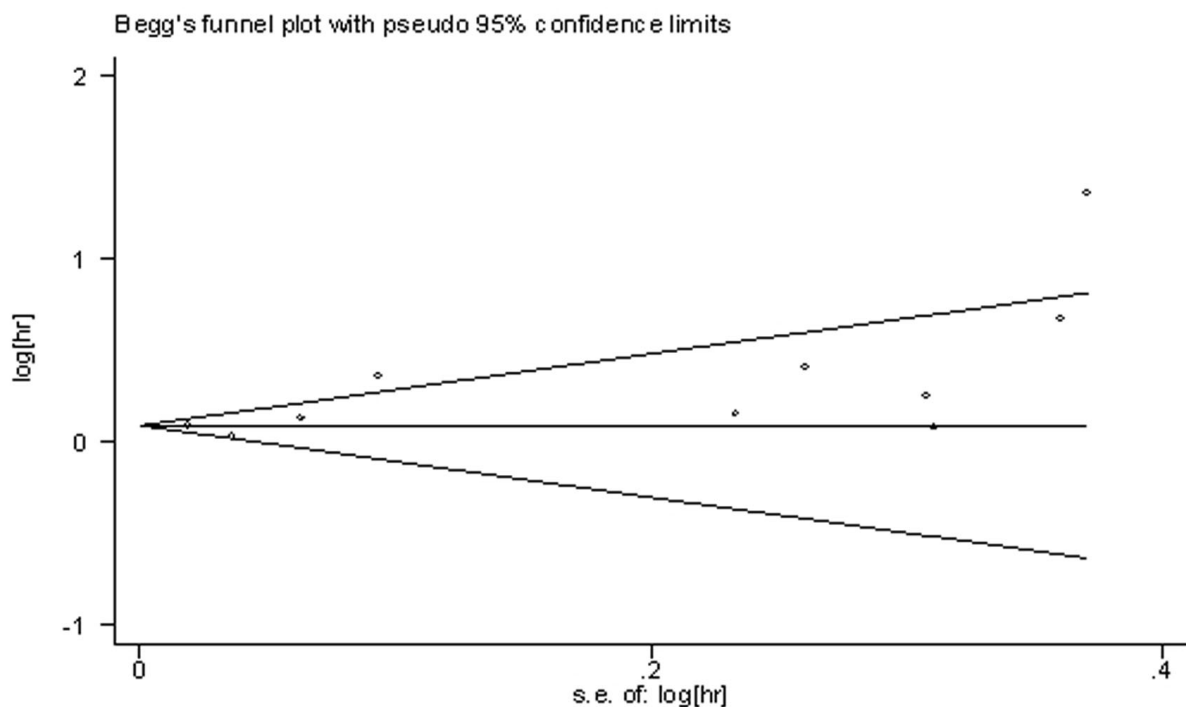

**Figure 6: Funnel plots of publication bias on the correlation between lncRNA-H19 expression and OS.**

tissues was significant higher than that of in healthy or para-carcinoma tissues [25, 26, 36, 37]. And the increased expression of H19 in cancer tissues was frequently positively correlated with advanced clinical stage and inversely correlated with patient’s prognosis [30, 31, 38].

The H19 was a potential target for exploration of cancer drugs. The migration, proliferation and invasion of the tumor cells were able to be significantly inhibited by the

knockdown of H19 in vitro. Whereas, enhanced expression of H19 could promote cell proliferation, invasion and metastasis [39, 40]. Therefore, growing evidences suggested that high-expression of lncRNA-H19 promoted development and progression of certain cancers. It was characterized as one kind of crucial oncogenic lncRNAs. However, the underlying molecular mechanisms on the role of H19 in cancer progression and metastasis remained unclear.

Many studies have tried to explore the function mechanism of H19 on tumorigenesis and development. It suggested that H19 promoted pancreatic cancer metastasis by depressing let-7's suppression on its target HMGA2-mediated EMT [41]. Furthermore, a recent study indicated that upregulated H19 could accelerate bladder cancer metastasis by associating EZH2 and inhibiting expression of -E-cadherin, which was the EMT-induced marker [42]. Chen *et al.* also showed that GC metastasis was promoted by up-regulated H19 *in vitro* partly by regulating the E-cadherin expression [28]. And in osteosarcoma, Li *et al.* revealed that H19 could function as a ceRNA in promoting metastasis by impairing miR-200s activity [43].

H19 was the primary precursor of miR-675 and the biological role of H19 in both humans and mice was also elucidated [44]. This finding was confirmed in human colon cancer cells, and furthermore, H19/miR-675 was demonstrated to inhibit suppressor RB in colorectal carcinogenesis [45]. Another study also showed that GC metastasis could be enhanced by H19 *in vitro* and *in vivo* through H19/miR-675 signalling [22]. In breast cancer, Vennin *et al.* found that H19, through its mediator-miR-675, could promote tumor growth and metastasis by down-regulating c-Cbl and Cbl-b [46]. The H19 was recently reported as a molecular sponge to antagonize let-7 [47], which was well-known as a tumor-suppressive microRNA.

There were still many limitations in this meta-analysis. Firstly, the roles and biological functions of lncRNA-H19 differed in different types of cancer. The heterogeneity may be increased, thus influencing firmness of the results. Secondly, all the studies were retrospective studies, with a relatively small sample size. Thirdly, patients included in this meta-analysis were all Asians, for this reason, the results we obtained may just be representative of Asians. Additionally, potential selection and publication bias may be resulted from diversification of data forms and the preference of positive results in publications. Finally, the cut-off definition for high expression in cancerous tissue was not always consistent.

The present meta-analysis explored that high expression of lncRNA-H19 was positively correlated to poor prognosis and clinicopathological features. Higher lncRNA-H19 expression was significantly correlated with shorter OS and potential poorer DFS in human solid tumors. Furthermore, the clinicopathological significance of over-expressed lncRNA-H19 was also confirmed in this meta-analysis. Increased expression of lncRNA-H19 was shown to be positively correlated with poor differentiation and advanced clinical stage. The patients determined with higher expression of lncRNA-H19 in cancer tissues might also have higher occurrence probability of LNM. Those results suggested that lncRNA-H19 may be served as a biomarker for both prognosis and clinical pathology. Further studies are still needed to verify the clinical utility of H19 in human cancers.

## MATERIALS AND METHODS

### Literature retrieval strategy

Potentially eligible studies were obtained by retrieving key words in multiple databases. The studies were published from 1966 to April 23, 2016. The databases included PubMed, Web of Science, Embase, CNKI and Wanfang database. Following key words were searched in combinations: long non-codingRNA H19, H19, lncRNA H19, H19 fetal liver mRNA; cancer, tumor, neoplasm; prognostic, outcomes, survival, clinicopathological. Other relevant studies were also obtained by manually screening the references list.

### Inclusion and exclusion criteria

Inclusion criteria: (1) the lncRNA-H19 expression was evaluated in human cancer tissues; (2) patients were divided into high expression group and low expression group according to the expression levels of H19; (3) associations of H19 expression with overall survival (OS), disease-free survival (DFS) or clinicopathological features were described.

Exclusion criteria: (1) duplicate publications; (2) studies without available data; (3) overlapping data; (4) reviews, letters, case reports and expert opinions.

### Date extraction and quality assessment

The data were independently extracted from included studies by two investigators (PH and QC), and any disagreements were discussed and judged by a third investigator (XGF). For each study, the following information and data were recorded: the family name of first author, year of publication, country, ethnicity, cancer type, number of patients, follow-up times, outcome measures, cut-off value of H19 expression, analysis method and clinicopathological parameters (such as tender, tumor differentiation), lymph node metastasis, distant metastasis and TNM stage.

For studies provided the results of OS or DFS, multivariate analysis was considered to be prior to univariate analysis. If only Kaplan-Meier curve was provided, the survival data was extracted with Engauge Digitizer version 4.1. The Newcastle-Ottawa Scale (NOS) was involved for quality assessment. The NOS score was ranged from 0 to 9, and the study with an NOS score  $\geq 6$  was considered to be of high quality. The quality of all studies included in this meta-analysis ranged from 4 to 9, with a mean value of 6.2.

### Statistical methods

Statistical analysis of hazard ratios (HRs) for OS or DFS, and odd ratios (ORs) for clinicopathological parameters were calculated with Stata SE12.0 and RevMan5.3 software, respectively.

The heterogeneity across-studies were determined by Chisquare-based  $Q$  test and  $I^2$  statistics. A  $P$  value for  $Q$  test less than 0.05 indicated significant heterogeneity. The  $I^2$  value greater than 50 % was considered as severe heterogeneity, and then the random-effects model was applied. For insignificant heterogeneity among studies ( $P_h > 0.05$  or  $I^2 < 50\%$ ), the fixed effects model was applied.  $p$ -value less than 0.05 was considered to be statistically significant.

## ACKNOWLEDGMENTS AND FUNDING

We thank for the financial support of National Natural Science Foundation of China (No.81560389) and Graduate Innovation Fund of Nanchang University (No.cx2015168). Our deepest gratitude goes to the anonymous reviewers for their careful work and thoughtful suggestions that have helped improve this paper substantially.

## CONFLICTS OF INTEREST

The authors declared that there is no conflict of interests regarding the publication of this paper.

## REFERENCES

- Yang L, Froberg JE, Lee JT. Long noncoding RNAs: fresh perspectives into the RNA world. *Trends. Biochem. Sci.* 2014; 39:35-43.
- Bhan A, Mandal SS. Long noncoding RNAs: emerging stars in gene regulation, epigenetics and human disease. *Chem. Med. Chem.* 2014; 9:1932-1956.
- Hauptman N, Glavač D. Long non-coding RNA in cancer. *Int. J. Mol. Sci.* 2013; 14:4655-4669.
- Zhao XY, Lin JD. Long noncoding RNAs: A new regulatory code in metabolic control. *Trends Biochem. Sci.* 2015; 40:586-596.
- Li X, Wu Z, Fu X, Han W. lncRNAs: insights into their function and mechanics in underlying disorders. *Mutat Res. Rev. Mutat. Res.* 2014; 762:1-21.
- Santosh B, Varshney A, Yadava PK. Non-coding RNAs: biological functions and applications. *Endocr. Rev.* 2015; 36:25-64.
- Sun M, Kraus W L. From discovery to function: the expanding roles of long non-coding RNAs in physiology and disease. *Endocr. Rev.* 2014; 36:25-64.
- Hajjari M, Salavaty A. HOTAIR: an oncogenic long non-coding RNA in different cancers. *Cancer Biol. Med.* 2015; 12:1-9.
- Ma C, Shi X, Zhu Q, Li Q, Liu Y, Yao Y, Song Y. The growth arrest-specific transcript 5 (GAS5): a pivotal tumor suppressor long noncoding RNA in human cancers. *Tumour Biol.* 2016; 37:1437-1444.
- Wu L, Jin L, Zhang W, Zhang L. Roles of long non-coding RNA CCAT2 in cervical cancer cell growth and apoptosis. *Med.Sci.Monit.* 2016; 22:875-879.
- Chen N, Guo D, Xu Q, Yang M, Wang D, Peng M, Ding Y, Wang S, Zhou J. Long non-coding RNA FEZF1-AS1 facilitates cell proliferation and migration in colorectal carcinoma. *Oncotarget.* 2016; 7:11271-11283. doi: 10.18632/oncotarget.7168.
- Guo F, Guo L, Li Y, Zhou Q, Li Z. MALAT1 is an oncogenic long non-coding RNA associated with tumor invasion in non-small cell lung cancer regulated by DNA methylation. *Int. J. Clin. Exp Pathol.* 2015; 8:15903-15910.
- Eric J Devor, Jill N. DeMik, Brandon M. Schickling, Michael J. Goodheart, Kimberly K. Leslie. H19/miR-675 non-coding RNA expression differentiates among cancers of the human endometrium. *Proc. Obstet. Gynecol.* 2011; 2:7.
- Cui J, Mo J, Luo M, Yu Q, Zhou S, Li T, Zhang Y, Luo W. c-Myc-activated long non-coding RNA H19 downregulates miR-107 and promotes cell cycle progression of non-small cell lung cancer. *Int. J. Clin. Exp. Pathol.* 2015; 8:12400-12409.
- Li S, Yu Z, Chen SS, Li F, Lei CY, Chen XX, Bao JM, Luo Y, Lin GZ, Pang SY, Tan WL. The YAP1 oncogene contributes to bladder cancer cell proliferation and migration by regulating the H19 long noncoding RNA. *Urol. Oncol.* 2015; 33:427.e1-10.
- Barsyte-Lovejoy D, Lau SK, Boutros PC, Khosravi F, Jurisica I, Andrulis IL, Tsao MS, Penn LZ. The c-Myc oncogene directly induces the H19 noncoding RNA by allele-specific binding to potentiate tumorigenesis. *Cancer Res.* 2006; 66:5330-5337.
- Zhuang M, Gao W, Xu J, Wang P, Shu Y. The long non-coding RNA H19-derived miR-675 modulates human gastric cancer cell proliferation by targeting tumor suppressor RUNX1. *Biochem Biophys. Res. Commun.* 2014; 448:315-322.
- Luo M, Li Z, Wang W, Zeng Y, Liu Z, Qiu J. Upregulated H19 contributes to bladder cancer cell proliferation by regulating ID2 expression. *FEBS J.* 2013; 280:1709-1716.
- Shi Y, Wang Y, Luan W, Wang P, Tao T, Zhang J, Qian J, Liu N, You Y. Long non-coding RNA H19 promotes glioma cell invasion by deriving miR-675. *PLoS One.* 2014; 9:e86295.
- Matouk IJ, Raveh E, Abu-lail R, Mezan S, Gilon M, Gershtain E, Birman T, Gallula J, Schneider T, Barkali M, Richler C, Fellig Y, Sorin V, et al. Oncofetal H19 RNA promotes tumor metastasis. *Biochim. Biophys. Acta.* 2014; 1843:1414-1426.
- Zhang EB, Han L, Yin DD, Kong R, Wei D, Chen J. c-Myc-induced, long, noncoding H19 affects cell proliferation and predicts a poor prognosis in patients with gastric cancer. *Med. Oncol.* 2014; 31:914.
- Li H, Yu B, Li J, Su L, Yan M, Zhu Z, Liu B. Overexpression of lncRNA H19 enhances carcinogenesis and metastasis of gastric cancer. *Oncotarget.* 2014; 5:2318-2329. doi: 10.18632/oncotarget.1913.

23. Wang L, Cai Y, Zhao X, Jia X, Zhang J, Liu J, Zhen H, Wang T, Tang X, Liu Y, Wang J. Down-regulated long non-coding RNA H19 inhibits carcinogenesis of renal cell carcinoma. *Neoplasma*. 2015; 62:412-418.
24. Zhang E, Li W, Yin D, De W, Zhu L, Sun S, Han L. c-Myc-regulated long non-coding RNA H19 indicates a poor prognosis and affects cell proliferation in non-small-cell lung cancer. *Tumour Biol*. 2015:1-9.
25. Zhu Z, Song L, He J, Sun Y, Liu X, Zou X. Ectopic expressed long non-coding RNA H19 contributes to malignant cell behavior of ovarian cancer. *Int. J. Clin. Exp. Pathol*. 2015; 8:10082-10091.
26. Wang SH, Wu XC, Zhang MD, Weng MZ, Zhou D, Quan ZW. Long noncoding RNA H19 contributes to gallbladder cancer cell proliferation by modulated miR-194-5p targeting AKT2. *Tumour Biol*. 2016: 1-10.
27. Wu T, Qu L, He G, Tian L, Li L, Zhou H, Jin Q, Ren J, Wang Y, Wang J, Kan X, Liu M, Shen J, et al. Regulation of laryngeal squamous cell cancer progression by the lncRNA H19/miR-148a-3p/DNMT1 axis. *Oncotarget*, 2016; 7: 11553-11566. doi: 10.18632/oncotarget.7270.
28. Chen JS, Wang YF, Zhang XQ, Lv JM, Li Y, Liu XX, Xu TP. H19 serves as a diagnostic biomarker and up-regulation of H19 expression contributes to poor prognosis in patients with gastric cancer. *Neoplasma*. 2016; 63:223-230.
29. Han D, Gao X, Wang M, Qiao Y, Xu Y, Yang J, Dong N, He J, Sun Q, Lv G, Xu C, Tao J, Ma N. Long noncoding RNA H19 indicates a poor prognosis of colorectal cancer and promotes tumor growth by recruiting and binding to eIF4A3. *Oncotarget*. 2016; 7:22159-22173. doi: 10.18632/oncotarget.8063.
30. Yang Z, Lu Y, Xu Q, Tang B, Park CK, Chen X. HULC and H19 played different roles in overall and disease-free survival from hepatocellular carcinoma after curative hepatectomy: a preliminary analysis from gene expression omnibus. *Dis. Markers*. 2015; 2015:191029.
31. Huang C, Cao L, Qiu L, Dai X, Ma L, Zhou Y, Li H, Gao M, Li W, Zhang Q, Han K, Lv H. Upregulation of H19 promotes invasion and induces epithelial-to-mesenchymal transition in esophageal cancer. *Oncol. Lett*. 2015; 10:291-296.
32. Li CY, Liang GY, Yao WZ, Sui J, Shen X, Zhang YQ, Peng H, Hong WW, Ye YC, Zhang ZY, Zhang WH, Yin LH, Pu YP. Integrated analysis of long non-coding RNA competing interactions reveals the potential role in progression of human gastric cancer. *Int. J. Oncol*. 2016; 48:1965-1976.
33. Raveh E, Matouk IJ, Gilon M, Hochberg A. The H19 Long non-coding RNA in cancer initiation, progression and metastasis-a proposed unifying theory. *Mol Cancer*. 2015; 14:184.
34. Matouk IJ, Halle D, Raveh E. The role of the oncofetal H19 lncRNA in tumor metastasis: orchestrating the EMT-MET decision. *Oncotarget*. 2016; 7:3748-3765. doi: 10.18632/oncotarget.6387.
35. Smolle MA, Bullock MD, Ling H, Pichler M, Haybaeck J. Long non-coding RNAs in endometrial carcinoma. *Int. J. Mol. Sci*. 2015; 16:26463-26472.
36. Yang F, Bi J, Xue X, Zheng L, Zhi K, Hua J, Fang G. Up-regulated long non-coding RNA H19 contributes to proliferation of gastric cancer cells. *FEBS J*. 2012; 279:3159-3165.
37. Zhou X, Ye F, Yin C, Zhuang Y, Yue G, Zhang G. The interaction between miR-141 and lncRNA-H19 in regulating cell proliferation and migration in gastric cancer. *Cell. Physiol. Biochem*. 2015; 36:1440-1452.
38. Jiang X, Yan Y, Hu M, Chen X, Wang Y, Dai Y, Wu D, Wang Y, Zhuang Z, Xia H. Increased level of H19 long noncoding RNA promotes invasion, angiogenesis, and stemness of glioblastoma cells. *J. Neurosurg*. 2016; 124:129-136.
39. Wang L, Cai Y, Zhao X, Jia X, Zhang J, Liu J, Zhen H, Wang T, Tang X, Liu Y, Wang J. Down-regulated long non-coding RNA H19 inhibits carcinogenesis of renal cell carcinoma. *Neoplasma*, 2015; 62:412-418.
40. Zeira E, Abramovitch R, Meir K, Even Ram S, Gil Y, Bulvik B, Bromberg Z, Levkovitch O, Nahmansson N, Adar R, Reubinoff B, Galun E, Gropp M. The knockdown of H19 lncRNA reveals its regulatory role in pluripotency and tumorigenesis of human embryonic carcinoma cells. *Oncotarget*, 2015; 6:34691-34703. doi: 10.18632/oncotarget.5787.
41. Ma C, Nong K, Zhu H, Wang W, Huang X, Yuan Z, Ai K. H19 promotes pancreatic cancer metastasis by derepressing let-7's suppression on its target HMGA2-mediated EMT. *Tumour Biol*. 2014; 35: 9163-9169.
42. Luo M, Li Z, Wang W, Zeng Y, Liu Z, Qiu J. Long non-coding RNA H19 increases bladder cancer metastasis by associating with EZH2 and inhibiting E-cadherin expression. *Cancer Lett*. 2013; 333:213-221.
43. Li M, Chen H, Zhao Y, Gao S, Cheng C. H19 functions as a ceRNA in promoting metastasis through decreasing miR-200s activity in osteosarcoma. *DNA Cell Biol*. 2016; 35:235-240.
44. Cai X, Cullen BR. The imprinted H19 noncoding RNA is a primary microRNA precursor. *RNA*. 2007; 13:313-316.
45. Tsang WP, Ng EK, Ng SS, Jin H, Yu J, Sung JJ, Kwok TT. Oncofetal H19-derived miR-675 regulates tumor suppressor RB in human colorectal cancer. *Carcinogenesis*. 2010; 31:350-358.
46. Vennin C, Spruyt N, Dahmani F, Julien S, Bertucci F, Finetti P, Chassat T, Bourette RP, Le Bourhis X, Adriaenssens E. H19 non coding RNA-derived miR-675 enhances tumorigenesis and metastasis of breast cancer cells by downregulating c-Cbl and Cbl-b. *Oncotarget*. 2015; 6:29209-29223. doi: 10.18632/oncotarget.4976.
47. Kallen AN, Zhou XB, Xu J, Qiao C, Ma J, Yan L, Lu L, Liu C, Yi JS, Zhang H, Min W, Bennett AM, Gregory RI, et al. The imprinted H19 lncRNA antagonizes let-7 microRNAs. *Mol Cell*. 2013; 52:101-112.
